# Supplementary material for: Neural network nonlinear factor analysis of high dimensional binary signals.
Source: Springer Nature journal article supplement (doi:10.1007/s00392-022-02032-z), 2005-01-01

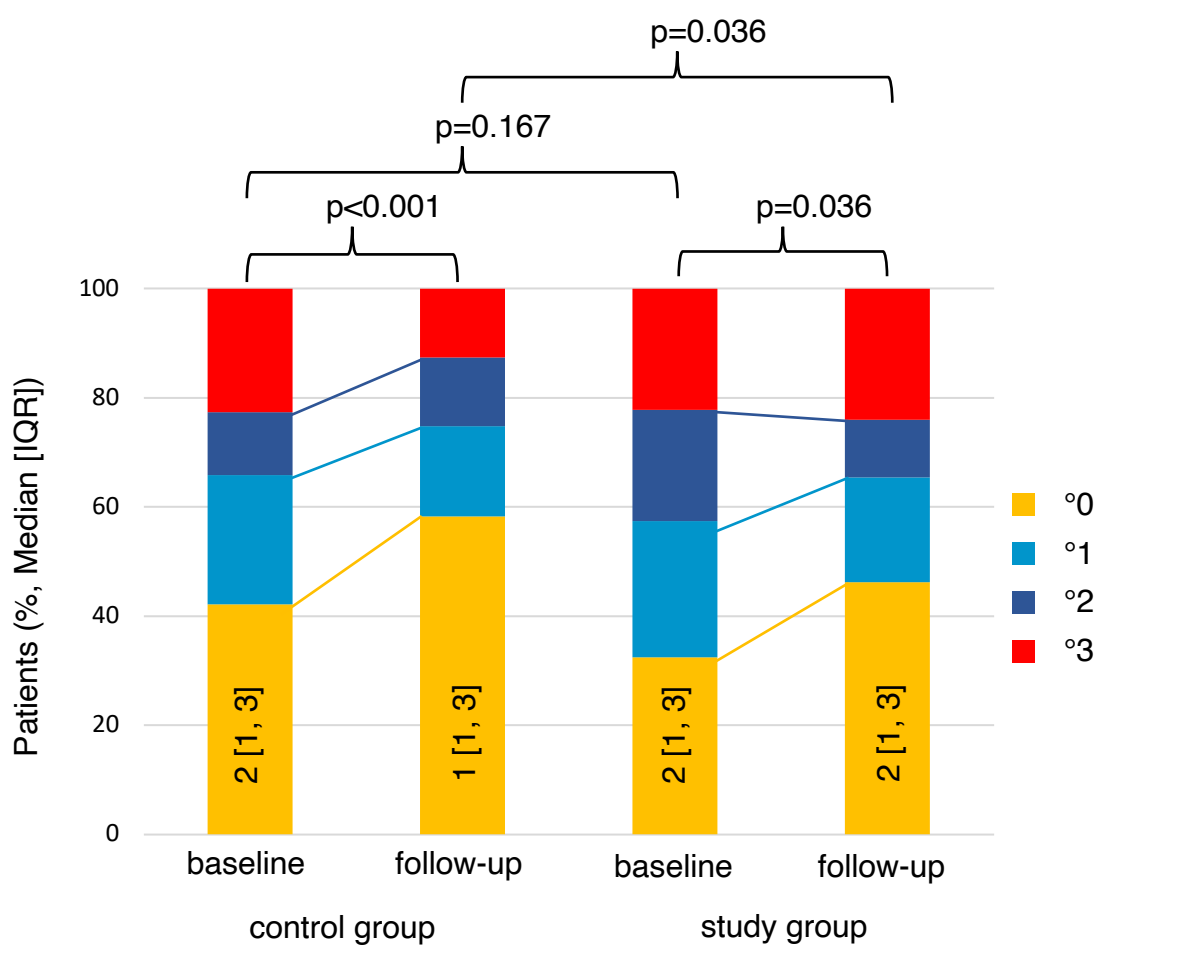

Supplement: MOESM2 [file 22765856]
