# Supplementary material for: Neural network nonlinear factor analysis of high dimensional binary signals.
Source: Springer Nature journal article supplement (doi:10.1007/s00392-022-02032-z), 2005-01-01
Supplement: MOESM3 [file 22765856]

**A**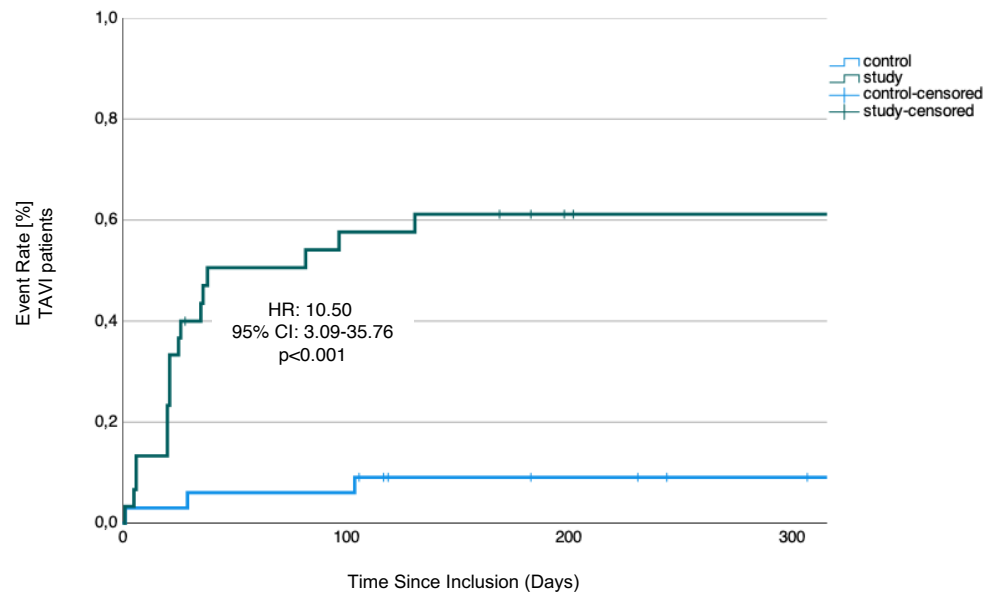

Number at risk:

|               |    |    |    |    |
|---------------|----|----|----|----|
| control group | 33 | 31 | 26 | 24 |
| study group   | 30 | 12 | 8  | 7  |

**B**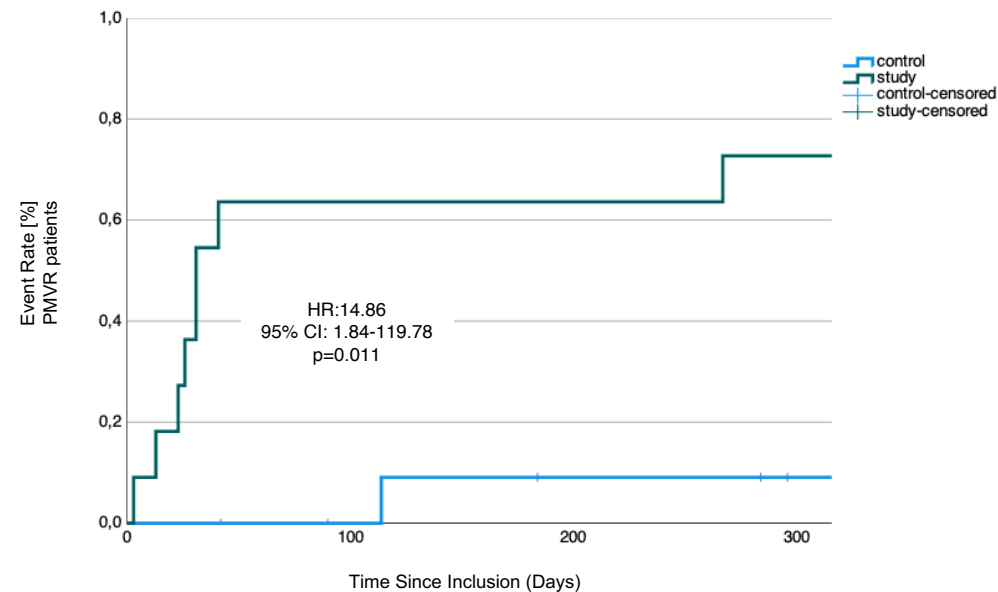

Number at risk:

|               |    |    |   |   |
|---------------|----|----|---|---|
| control group | 13 | 11 | 9 | 7 |
| study group   | 11 | 4  | 4 | 3 |
